# Supplementary material
Source: publisher figshare collection journal article supplement (https://acs.figshare.com/ndownloader/files/5164480)

## Supporting Information for

### Crystallographic Structures of Two Bisphosphonate:1-Deoxyxylulose-5-Phosphate Reductoisomerase Complexes

Shunsuke Yajima, Kodai Hara, John M. Sanders, Fenglin Yin, Kanju Ohsawa, Jochen  
Wiesner, Hassan Jomaa and Eric Oldfield

**Figure S1.** Stereo representation of the overall structure of the complex between **2** and DXR (dimer structure), PDB file 1T1R. The NADP domain is shown in red, the catalytic domain in yellow, the active site loop in purple and the C-terminal domain in green. The inhibitor **2** is shown in cyan.

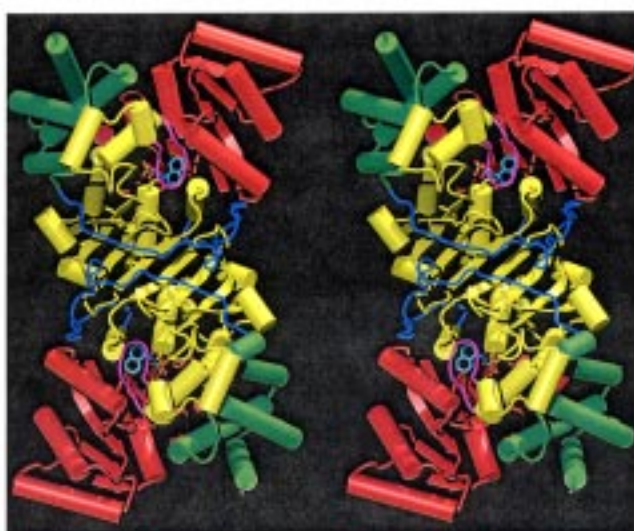

Supplement: Supplementary file 1 [file 5164480]
